# Supplementary material
Source: publisher site journal article supplement (https://www.dovepress.com/get_supplementary_file.php?f=493019.docx)
Supplement: Supplementary file 1 [file get_supplementary_file.php]

Table S1. Baseline characteristics and outcome in the training and the validation cohorts

| Variables | Train cohort  (n=637) | Validation cohort  (n=261) | P value |
| --- | --- | --- | --- |
| Age, years, median (IQR) | 67.00（56.00-76.00） | 68.00 (59.00-76.00) | 0.241 |
| Male gender, n (%) | 443（69.5） | 177 (67.8) | 0.611 |
| Comorbidities n (%) |  |  |  |
| Diabetes mellitus | 184（28.9） | 60 (23.0) | 0.071 |
| Myocardial infarction | 38（6.0） | 13 (5.0) | 0.563 |
| Liver disease | 44（6.9） | 17 (6.5) | 0.831 |
| Chronic kidney disease | 90（14.1） | 35（13.4） | 0.778 |
| Solid tumor | 84（13.2） | 42（16.1） | 0.255 |
| Hematologic malignancy | 30（4.7） | 7（2.7） | 0.165 |
| Connective tissue disease | 33（5.2） | 12（4.6） | 0.716 |
| Transplantation | 40（6.3） | 12（4.6） | 0.327 |
| Cerebrovascular disease | 117（18.4） | 37（14.2） | 0.130 |
| Immunosuppression, n (%) | 167（26.2） | 67 (25.7) | 0.866 |
| Laboratory indicators, median (IQR) |  |  |  |
| White blood cell （10⁹/L） | 11.37（6.95-16.60） | 11.25 (6.75-15.62) | 0.637 |
| Lymphocyte（10⁹/L） | 0.56（0.30-0.93） | 0.47 (0.31-0.79) | 0.146 |
| Neutrophil（10⁹/L） | 9.95（5.77-14.63） | 10.21 (5.70-14.39) | 0.772 |
| C reactive protein (mg/L) | 101.29（40.47-175.38） | 88.88 (42.77-153.94) | 0.367 |
| Procalcitonin (ng/ml) | 1.07（0.26-9.06） | 1.12 (0.29-5.47) | 0.851 |
| SOFA score at transfer to ICU, median (IQR) | 7.00（5.00-10.00） | 7.00（5.00-10.00） | 0.227 |
| Organ dysfunction, n (%) |  |  |  |
| Respiratory | 559（87.8） | 244（93.5） | 0.011 |
| Coagulation | 180（28.3） | 69（26.4） | 0.580 |
| Liver | 86（13.5） | 38（14.6） | 0.676 |
| Cardiovascular | 319（50.1） | 127（48.7） | 0.699 |
| Neurological | 175（27.5） | 99（37.9） | 0.002 |
| Kidney | 151（23.7） | 56（21.5） | 0.467 |
| Time from ICU admission to mNGS testing, days, median (IQR) | 3.00（2.00-4.00） | 3.00（2.00-4.00） | 0.440 |
| Clinical metagenomics results, n (%) |  |  |  |
| Acinetobacter spp. | 178（27.9） | 64 (24.5) | 0.294 |
| Klebsiella spp. | 182（28.6） | 69（26.4） | 0.517 |
| Pseudomonas spp. | 92（14.4） | 31（11.9） | 0.310 |
| Stenotrophomonas spp. | 87（13.7） | 35（13.4） | 0.922 |
| Enterococcus spp. | 101（15.9） | 34（13.0） | 0.282 |
| Burkholderia spp. | 43（6.8） | 19（7.3） | 0.776 |
| Staphylococcus spp. | 62（9.7） | 22（8.4） | 0.542 |
| Corynebacterium spp. | 33（5.2） | 14（5.4） | 0.911 |
| Escherichia spp. | 26（4.1） | 10（3.8） | 0.862 |
| Streptococcus spp. | 67（10.5） | 17 (6.5) | 0.061 |
| Haemophilus spp. | 27（4.2） | 10（3.8） | 0.780 |
| Elizabethkingia spp. | 19（3.0） | 8（3.1） | 0.948 |
| Achromobacter spp. | 20（3.1） | 4（1.5） | 0.175 |
| Enterobacter spp. | 15（2.4） | 2（0.8） | 0.188 |
| Candida spp. | 184（28.9） | 84（32.2） | 0.327 |
| Pneumocystis spp. | 74（11.6） | 24（9.2） | 0.291 |
| Aspergillus spp. | 102（16.0） | 45（17.2） | 0.651 |
| Torque teno virus | 61（9.6） | 22（8.4） | 0.590 |
| Nakaseomyces spp. | 35（5.5） | 19（7.3） | 0.307 |
| Serratia spp. | 17（2.7） | 2（0.8） | 0.072 |
| HSV 1 | 142（22.3） | 74（28.4） | 0.054 |
| EBV | 111（17.4） | 45（17.2） | 0.947 |
| CMV | 111（17.4） | 52（19.9） | 0.378 |
| HHV 7 | 22 (3.5) | 11（4.2） | 0.582 |
| HHV 6b | 10 (1.6) | 4（1.5） | 1.000 |
| Duration of mechanical ventilation within 28 days, days, median (IQR) | 9.00（5.00-15.00） | 9.00（5.00-17.00） | 0.292 |
| Hospital stay, day, median (IQR) | 18.00 (10.00-31.00) | 17.00 (9.50-26.50) | 0.368 |
| ICU stay, day, median (IQR) | 12.00 (7.00-22.00) | 12.00 (8.00-21.00) | 0.826 |
| 28-day mortality in ICU, n (%) | 301 (47.3) | 148（56.7） | 0.010 |

**Note:** Data are presented as median (interquartile range), n (%).

**Abbreviations:** CMV: Cytomegalovirus; EBV: Epstein-Barr virus; HSV: Herpes simplex virus; HHV: Human herpes virus; IQR, interquartile range; ICU, Intensive Care Unit; mNGS, Metagenomic next-generation sequencing; SOFA, Sequential Organ Failure Assessment;
